# Supplementary material
Source: Springer Nature journal article supplement (https://www.springermedizin.de/resource/supplementary/12872_2010_320_MOESM4_ESM.pdf/9429694)

**A**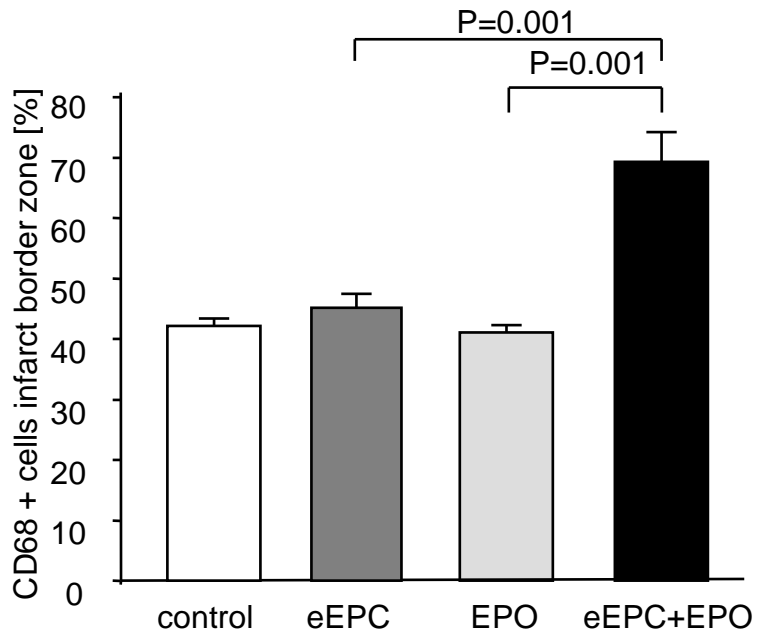**B**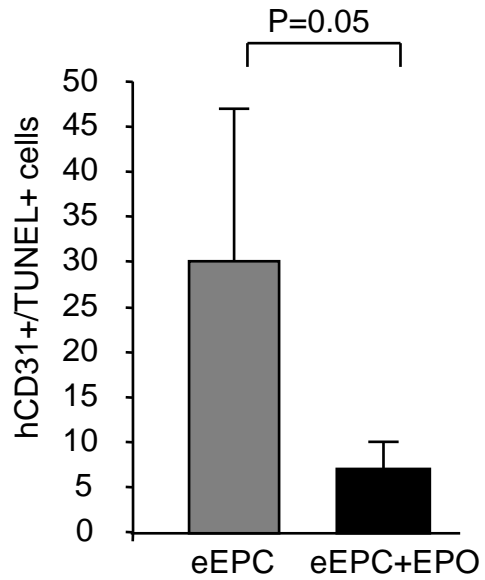

Supplement: MOESM4 [file 9429694]
